# Supplementary figures and images for: The secretome of adipose-derived mesenchymal stem cells attenuates epithelial–mesenchymal transition in human corneal epithelium
Source: PubMed Central journal article supplement — Regen Ther. 2019 Jul 2;11:114–22. doi: 10.1016/j.reth.2019.06.005 (PMC6609787; doi:10.1016/j.reth.2019.06.005), 2019-07-02

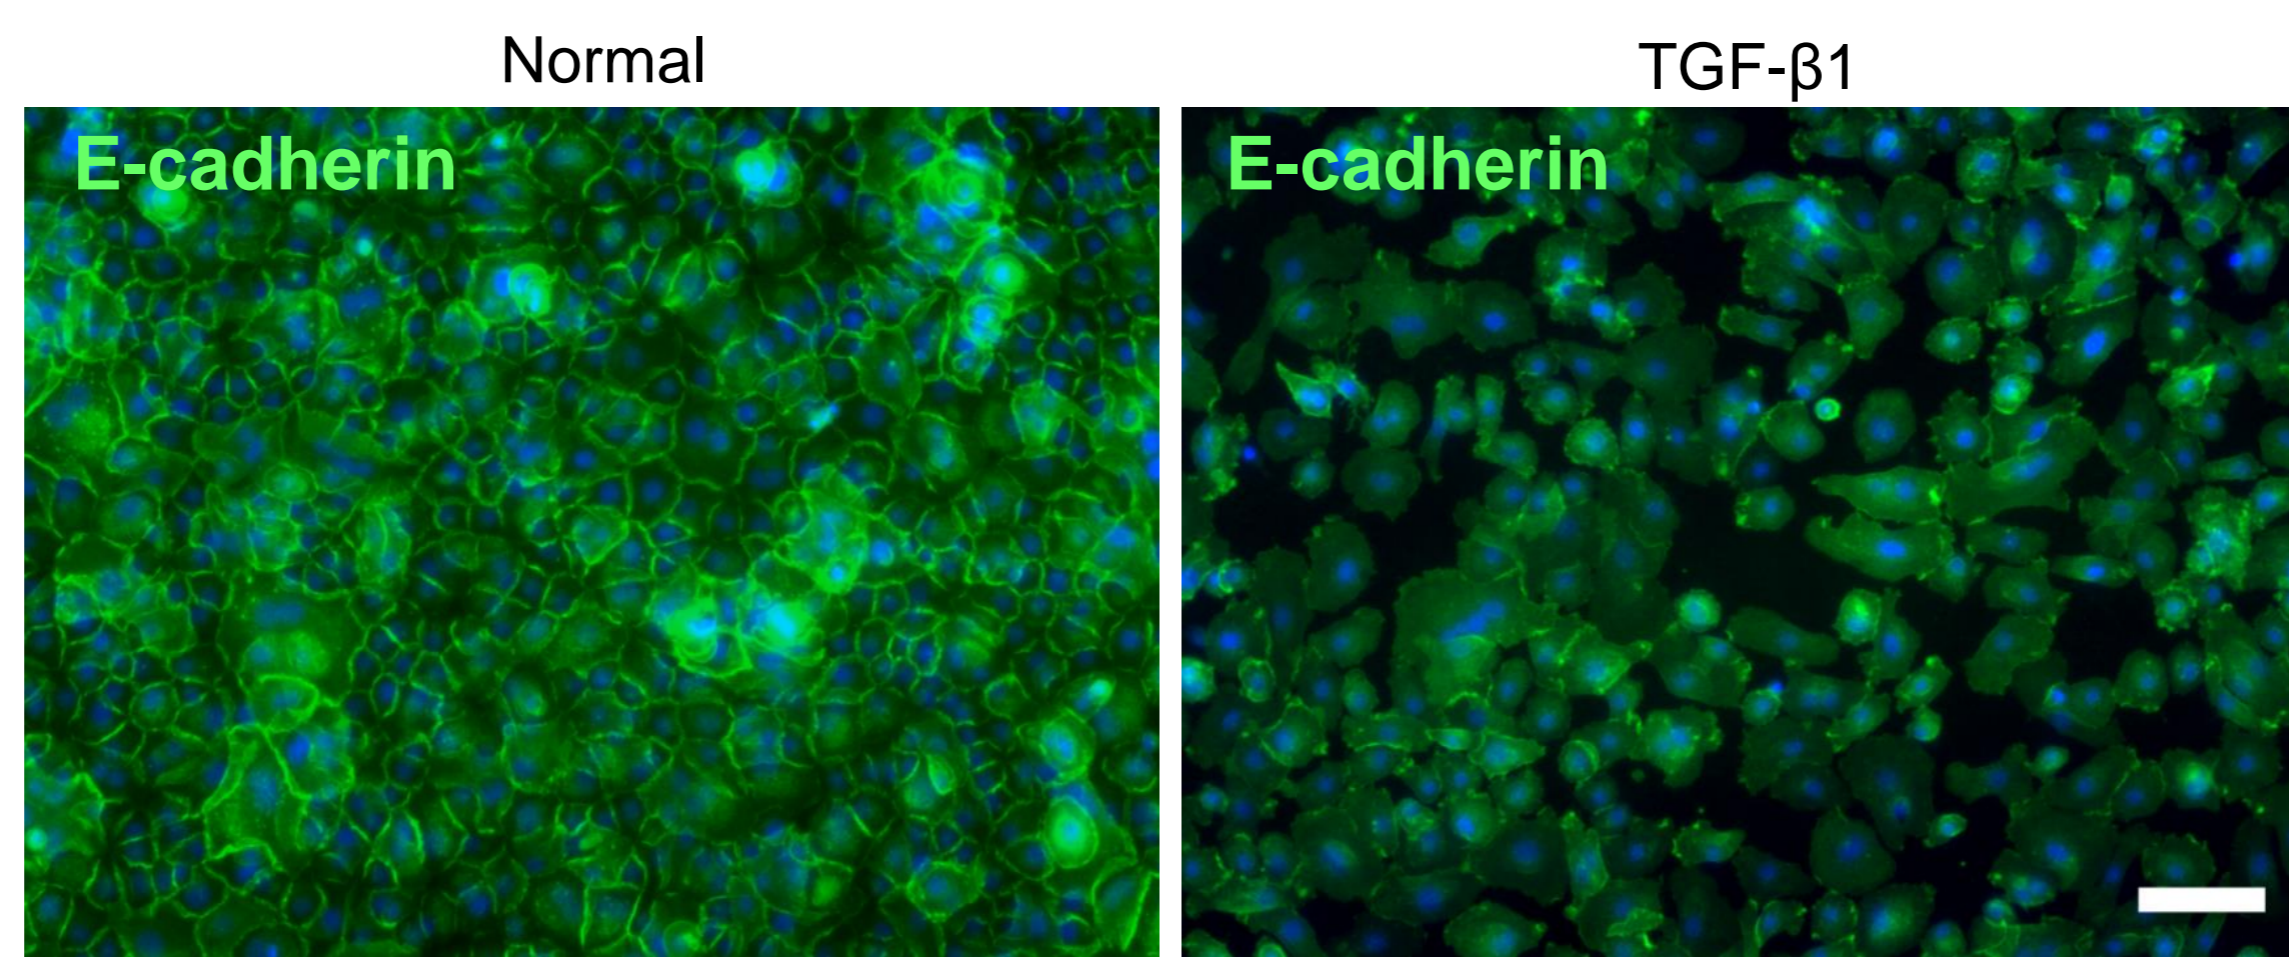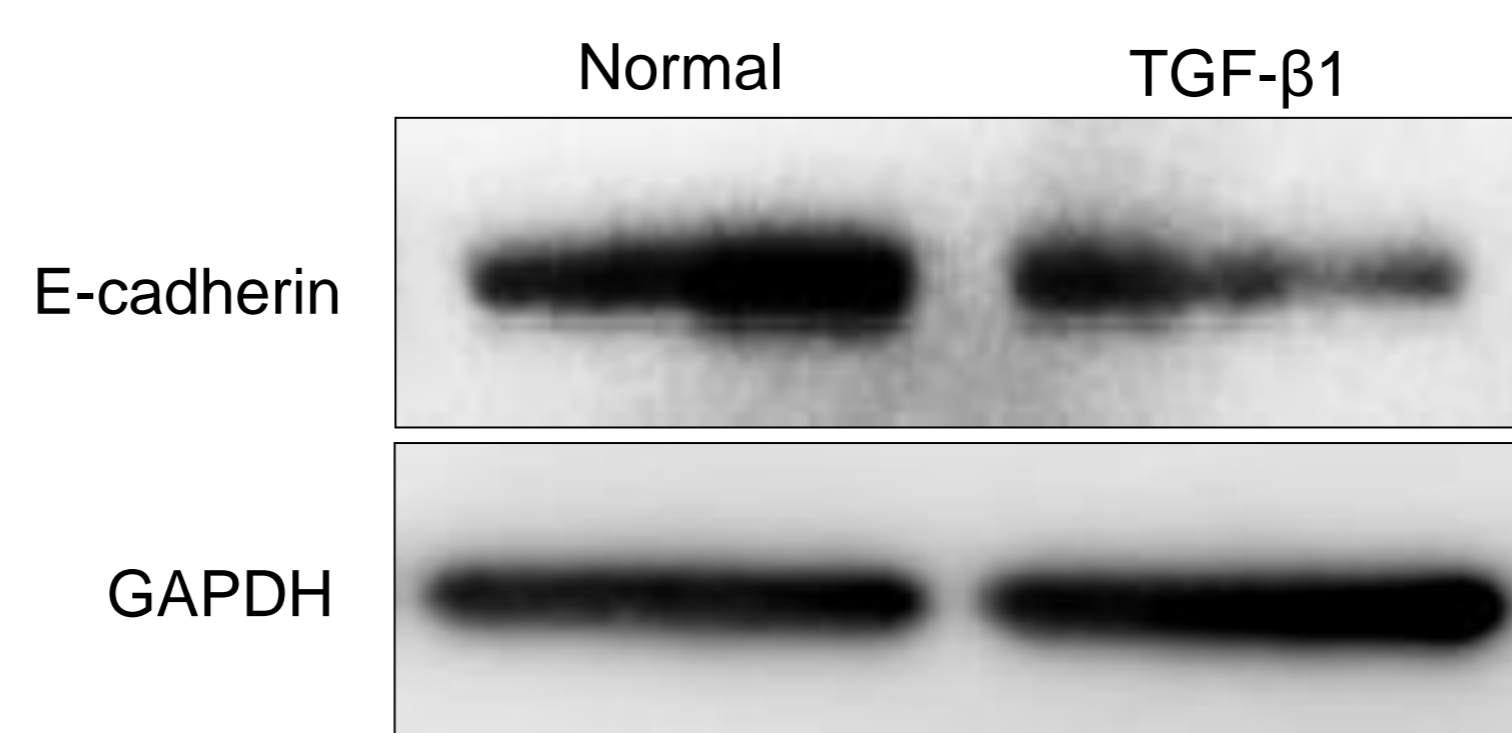

**Supplemental Fig. 1.**

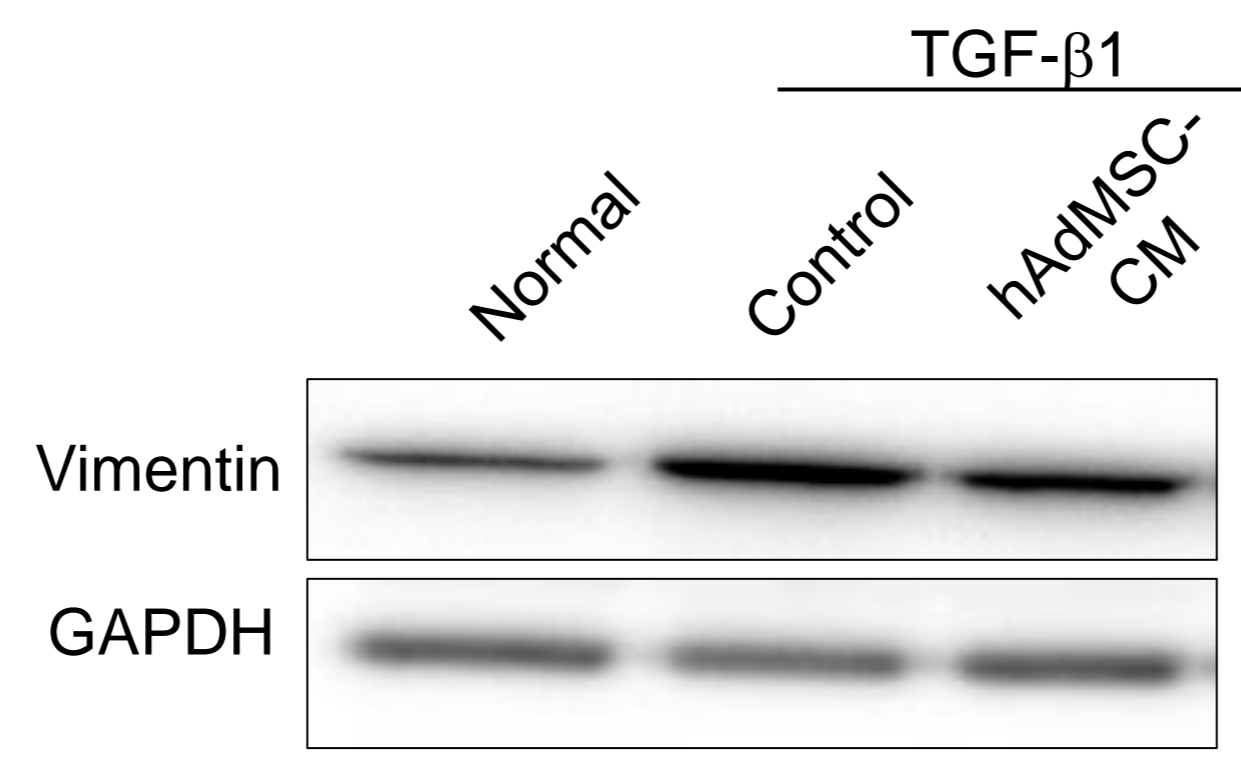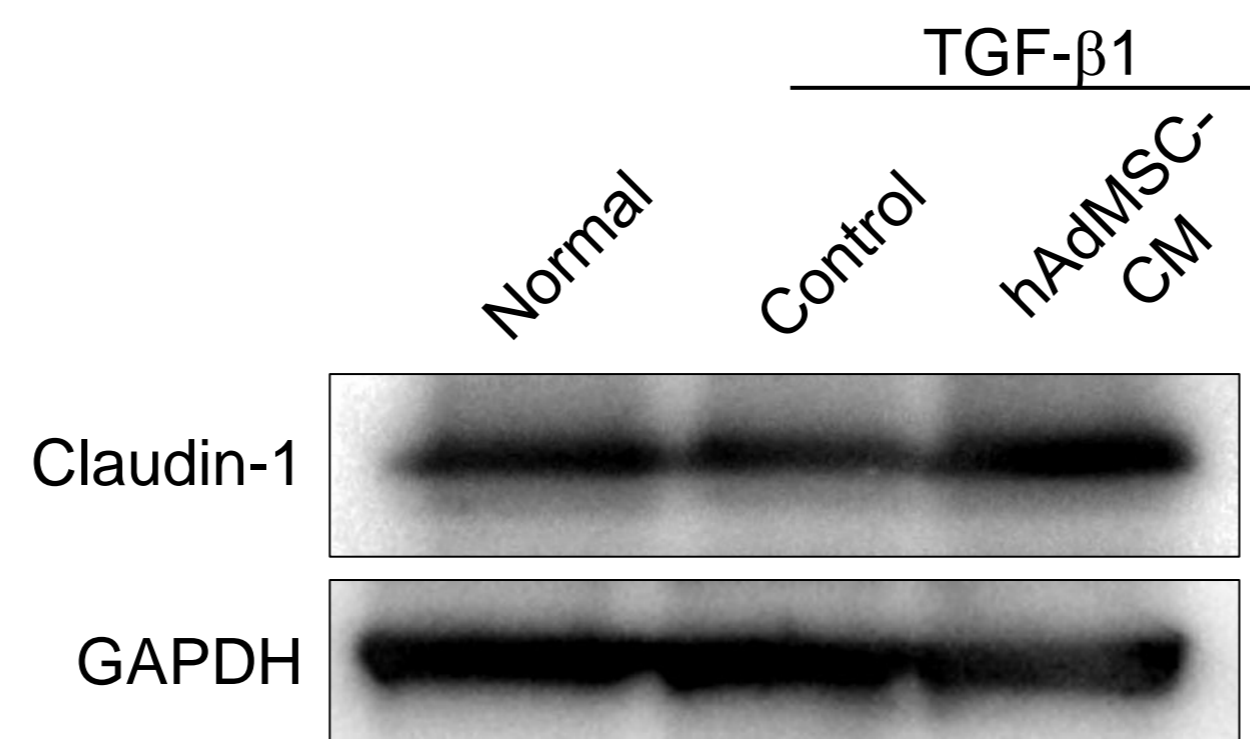

**Supplemental Fig. 2.**

Supplement: mmc1.pdf [file mmc1.pdf]
